# Supplementary material for: Accuracy of online survey assessment of mental disorders and suicidal thoughts and behaviors in Spanish university students. Results of the WHO World Mental Health- International College Student initiative
Source: PubMed Central journal article supplement (PMC6728025; doi:10.1371/journal.pone.0221529), 2019-09-05
Supplement: pone.0221529.s001.pdf [file pone.0221529.s001.pdf]

**S1 Table. Sensitivity, specificity, likelihood ratio positive (LR+), likelihood ratio negative (LR-), McNemar and Area Under the Curve (AUC) for different cut-off points of Major Depressive Episode 12-month algorithm for estimating reference standard (MINI) (n=287)**

| Cutpoint | Sensitivity | Specificity | LR+  | LR- | McNemar  |         | AUC  |
|----------|-------------|-------------|------|-----|----------|---------|------|
|          |             |             |      |     | $\chi^2$ | p-value |      |
| (>= 1 )  | 97.8        | 64.6        | 2.8  | 0   | 92.8     | <.0001* | 0.81 |
| (>= 2 )  | 97.8        | 64.6        | 2.8  | 0   | 92.8     | <.0001* | 0.81 |
| (>= 3 )  | 97.8        | 64.6        | 2.8  | 0   | 92.8     | <.0001* | 0.81 |
| (>= 4 )  | 97.8        | 64.6        | 2.8  | 0   | 92.8     | <.0001* | 0.81 |
| (>= 5 )  | 97.8        | 65.0        | 2.8  | 0   | 91.7     | <.0001* | 0.81 |
| (>= 6 )  | 97.8        | 65.0        | 2.8  | 0   | 91.7     | <.0001* | 0.81 |
| (>= 7 )  | 97.8        | 65.0        | 2.8  | 0   | 91.7     | <.0001* | 0.81 |
| (>= 8 )  | 97.8        | 65.5        | 2.8  | 0   | 90.4     | <.0001* | 0.82 |
| (>= 9 )  | 97.8        | 67.2        | 3.0  | 0   | 86.1     | <.0001* | 0.83 |
| (>= 10 ) | 97.8        | 67.2        | 3.0  | 0   | 86.1     | <.0001* | 0.83 |
| (>= 11 ) | 92.5        | 69.6        | 3.0  | 0.1 | 77.1     | <.0001* | 0.81 |
| (>= 12 ) | 92.5        | 71.7        | 3.3  | 0.1 | 71.5     | <.0001* | 0.82 |
| (>= 13 ) | 92.5        | 82.8        | 5.4  | 0.1 | 42.3     | <.0001* | 0.88 |
| (>= 14 ) | 73.0        | 87.4        | 5.8  | 0.3 | 22.4     | <.0001* | 0.80 |
| (>= 15 ) | 70.8        | 89.6        | 6.8  | 0.3 | 15.9     | <.0001* | 0.80 |
| (>= 16 ) | 60.3        | 91.5        | 7.1  | 0.4 | 8.84     | 0.003*  | 0.76 |
| (>= 17 ) | 49.8        | 92.3        | 6.5  | 0.5 | 5.3      | 0.021*  | 0.71 |
| (>= 18 ) | 46.9        | 93.9        | 7.7  | 0.6 | 2.28     | 0.131   | 0.70 |
| (>= 19 ) | 43.7        | 96.9        | 14.1 | 0.6 | 0.04     | 0.835   | 0.70 |
| (>= 20 ) | 26.4        | 97.2        | 9.4  | 0.8 | 1.15     | 0.283   | 0.62 |
| (>= 21 ) | 16.1        | 97.4        | 6.2  | 0.9 | 2.22     | 0.136   | 0.57 |
| (>= 22 ) | 5.60        | 98.0        | 2.8  | 1   | 4.79     | 0.029*  | 0.52 |
| (>= 23 ) | 5.60        | 98.7        | 4.3  | 1   | 7.81     | 0.005*  | 0.52 |
| (>= 24 ) | 2.90        | 99.0        | 2.9  | 1   | 9.53     | 0.002*  | 0.51 |

\*P-value statistically significant 0.05.
