# Supplementary material for: Accuracy of online survey assessment of mental disorders and suicidal thoughts and behaviors in Spanish university students. Results of the WHO World Mental Health- International College Student initiative
Source: PubMed Central journal article supplement (PMC6728025; doi:10.1371/journal.pone.0221529), 2019-09-05
Supplement: pone.0221529.s002.pdf [file pone.0221529.s002.pdf]

**S2 Table. Sensitivity, specificity, likelihood ratio positive (LR+), likelihood ratio negative (LR-), McNemar and Area Under the Curve (AUC) for different cut-off points of Major Depressive Episode lifetime algorithm for estimating reference standard (MINI) (n=287)**

| Cutpoint | Sensitivity | Specificity | LR+ | LR- | McNemar  |         | AUC  |
|----------|-------------|-------------|-----|-----|----------|---------|------|
|          |             |             |     |     | $\chi^2$ | p-value |      |
| (>= 1 )  | 99          | 46.4        | 1.8 | 0   | 122.9    | <.0001* | 0.73 |
| (>= 2 )  | 99          | 46.4        | 1.8 | 0   | 122.9    | <.0001* | 0.73 |
| (>= 3 )  | 99          | 46.4        | 1.8 | 0   | 122.9    | <.0001* | 0.73 |
| (>= 4 )  | 99          | 46.4        | 1.8 | 0   | 122.9    | <.0001* | 0.73 |
| (>= 5 )  | 99          | 46.4        | 1.8 | 0   | 122.9    | <.0001* | 0.73 |
| (>= 6 )  | 99          | 46.4        | 1.8 | 0   | 122.9    | <.0001* | 0.73 |
| (>= 7 )  | 99          | 46.4        | 1.8 | 0   | 122.9    | <.0001* | 0.73 |
| (>= 8 )  | 99          | 47.5        | 1.9 | 0   | 120.3    | <.0001* | 0.73 |
| (>= 9 )  | 99          | 49.0        | 1.9 | 0   | 116.8    | <.0001* | 0.74 |
| (>= 10 ) | 97.1        | 50.1        | 1.9 | 0.1 | 111.1    | <.0001* | 0.74 |
| (>= 11 ) | 97.1        | 54.4        | 2.1 | 0.1 | 101.3    | <.0001* | 0.76 |
| (>= 12 ) | 96.3        | 57.7        | 2.3 | 0.1 | 92.8     | <.0001* | 0.77 |
| (>= 13 ) | 95.9        | 64.9        | 2.7 | 0.1 | 75.5     | <.0001* | 0.80 |
| (>= 14 ) | 88.9        | 69.8        | 2.9 | 0.2 | 56.0     | <.0001* | 0.79 |
| (>= 15 ) | 61.8        | 73.3        | 2.3 | 0.5 | 24.9     | <.0001* | 0.68 |
| (>= 16 ) | 53.5        | 78.1        | 2.4 | 0.6 | 12.2     | 0.001*  | 0.66 |
| (>= 17 ) | 48.6        | 84.0        | 3.0 | 0.6 | 3.09     | 0.078   | 0.66 |
| (>= 18 ) | 46.6        | 86.6        | 3.5 | 0.6 | 0.82     | 0.365   | 0.67 |
| (>= 19 ) | 43.5        | 91.6        | 5.2 | 0.6 | 0.89     | 0.346   | 0.68 |
| (>= 20 ) | 33.6        | 92.5        | 4.5 | 0.7 | 3.43     | 0.064   | 0.63 |
| (>= 21 ) | 25.0        | 94.4        | 4.5 | 0.8 | 9.09     | 0.003*  | 0.60 |
| (>= 22 ) | 15.6        | 95.1        | 3.2 | 0.9 | 14.1     | 0.0002* | 0.55 |
| (>= 23 ) | 12.1        | 95.9        | 3.0 | 0.9 | 17.9     | <.0001* | 0.54 |
| (>= 24 ) | 6.60        | 98.5        | 4.4 | 0.9 | 32.2     | <.0001* | 0.53 |

\*P-value statistically significant 0.05.
