# Supplementary material for: Accuracy of online survey assessment of mental disorders and suicidal thoughts and behaviors in Spanish university students. Results of the WHO World Mental Health- International College Student initiative
Source: PubMed Central journal article supplement (PMC6728025; doi:10.1371/journal.pone.0221529), 2019-09-05
Supplement: pone.0221529.s003.pdf [file pone.0221529.s003.pdf]

**S3 Table. Sensitivity, specificity, likelihood ratio positive (LR+), likelihood ratio negative (LR-), McNemar and Area Under the Curve (AUC) for different cut-off points of Mania/Hypomania 12-month algorithm for estimating reference standard (MINI) (weighted values)**

| Cutpoint | Sensitivity | Specificity | LR+  | LR- | McNemar  |         | AUC  |
|----------|-------------|-------------|------|-----|----------|---------|------|
|          |             |             |      |     | $\chi^2$ | p-value |      |
| (>= 2)   | 33.6        | 89.2        | 3.1  | 0.7 | 21.7     | <.0001* | 0.61 |
| (>= 3)   | 33.6        | 91.9        | 4.1  | 0.7 | 14.4     | 0.0001* | 0.63 |
| (>= 4)   | 33.6        | 97.7        | 14.6 | 0.7 | 1.03     | 0.310   | 0.66 |

\*P-value statistically significant 0.05.
