# Supplementary material for: Accuracy of online survey assessment of mental disorders and suicidal thoughts and behaviors in Spanish university students. Results of the WHO World Mental Health- International College Student initiative
Source: PubMed Central journal article supplement (PMC6728025; doi:10.1371/journal.pone.0221529), 2019-09-05
Supplement: pone.0221529.s004.pdf [file pone.0221529.s004.pdf]

**S4 Table. Sensitivity, specificity, likelihood ratio positive (LR+), likelihood ratio negative (LR-), McNemar and Area Under the Curve (AUC) for different cut-off points of Mania/Hypomania lifetime algorithm for estimating reference standard (MINI) (weighted values)**

| Cutpoint     | Sensitivity | Specificity | LR+ | LR- | McNemar  |         | AUC  |
|--------------|-------------|-------------|-----|-----|----------|---------|------|
|              |             |             |     |     | $\chi^2$ | p-value |      |
| ( $\geq 2$ ) | 83.7        | 77.6        | 3.7 | 0.2 | 57.2     | <.0001* | 0.81 |
| ( $\geq 3$ ) | 63.7        | 84.3        | 4.1 | 0.4 | 34.4     | <.0001* | 0.74 |
| ( $\geq 4$ ) | 20.9        | 95.5        | 4.6 | 0.8 | 1.52     | 0.218   | 0.58 |

\*P-value statistically significant 0.05.
