# Supplementary material for: Accuracy of online survey assessment of mental disorders and suicidal thoughts and behaviors in Spanish university students. Results of the WHO World Mental Health- International College Student initiative
Source: PubMed Central journal article supplement (PMC6728025; doi:10.1371/journal.pone.0221529), 2019-09-05
Supplement: pone.0221529.s005.pdf [file pone.0221529.s005.pdf]

**S5 Table. Sensitivity, specificity, likelihood ratio positive (LR+), likelihood ratio negative (LR-), McNemar and Area Under the Curve (AUC) for different cut-off points of Panic Disorder 12-month algorithm for estimating reference standard (MINI) (n=287)**

| Cutpoint | Sensitivity | Specificity | LR+  | LR- | McNemar  |         | AUC  |
|----------|-------------|-------------|------|-----|----------|---------|------|
|          |             |             |      |     | $\chi^2$ | p-value |      |
| (>= 1)   | 44.8        | 97.7        | 19.5 | 0.6 | 0.12     | 0.725   | 0.71 |
| (>= 2)   | 44.8        | 97.7        | 19.5 | 0.6 | 0.12     | 0.725   | 0.71 |
| (>= 3)   | 44.8        | 97.7        | 19.5 | 0.6 | 0.12     | 0.725   | 0.71 |
| (>= 4)   | 39.8        | 98.2        | 22.1 | 0.6 | 0.06     | 0.809   | 0.69 |
| (>= 5)   | 17.8        | 98.7        | 13.7 | 0.8 | 1.55     | 0.213   | 0.58 |
| (>= 6)   | 17.8        | 99.6        | 44.5 | 0.8 | 5.19     | 0.023*  | 0.59 |
| (>= 7)   | 4.90        | 100         | NA   | 1   | 8.74     | 0.003*  | 0.52 |

\*P-value statistically significant 0.05.
