# Supplementary material for: Accuracy of online survey assessment of mental disorders and suicidal thoughts and behaviors in Spanish university students. Results of the WHO World Mental Health- International College Student initiative
Source: PubMed Central journal article supplement (PMC6728025; doi:10.1371/journal.pone.0221529), 2019-09-05
Supplement: pone.0221529.s006.pdf [file pone.0221529.s006.pdf]

**S6 Table. Sensitivity, specificity, likelihood ratio positive (LR+), likelihood ratio negative (LR-), McNemar and Area Under the Curve (AUC) for different cut-off points of Panic Disorder lifetime algorithm for estimating reference standard (MINI) (n=287)**

| Cutpoint | Sensitivity | Specificity | LR+ | LR- | McNemar  |         | AUC  |
|----------|-------------|-------------|-----|-----|----------|---------|------|
|          |             |             |     |     | $\chi^2$ | p-value |      |
| (>= 1 )  | 71.1        | 82.8        | 4.1 | 0.3 | 26.7     | <.0001* | 0.77 |
| (>= 2 )  | 71.1        | 82.8        | 4.1 | 0.3 | 26.7     | <.0001* | 0.77 |
| (>= 3 )  | 71.1        | 83.2        | 4.2 | 0.3 | 25.7     | <.0001* | 0.77 |
| (>= 4 )  | 36.1        | 87.6        | 2.9 | 0.7 | 5.09     | 0.024*  | 0.62 |
| (>= 5 )  | 19.8        | 94.3        | 3.5 | 0.9 | 0.96     | 0.328   | 0.57 |
| (>= 6 )  | 6.5         | 98.4        | 4.1 | 1   | 14.1     | 0.0002* | 0.52 |
| (>= 7 )  | 3.2         | 99.6        | 8.0 | 1   | 21.9     | <.0001* | 0.51 |

\*P-value statistically significant 0.05.
