# Supplementary material for: Accuracy of online survey assessment of mental disorders and suicidal thoughts and behaviors in Spanish university students. Results of the WHO World Mental Health- International College Student initiative
Source: PubMed Central journal article supplement (PMC6728025; doi:10.1371/journal.pone.0221529), 2019-09-05
Supplement: pone.0221529.s007.pdf [file pone.0221529.s007.pdf]

**S7 Table. Sensitivity, specificity, likelihood ratio positive (LR+), likelihood ratio negative (LR-), McNemar and Area Under the Curve (AUC) for different cut-off points of Generalized Anxiety Disorder 12-month algorithm for estimating reference standard (MINI) (n=287)**

| Cutpoint | Sensitivity | Specificity | LR+  | LR- | McNemar  |         | AUC  |
|----------|-------------|-------------|------|-----|----------|---------|------|
|          |             |             |      |     | $\chi^2$ | p-value |      |
| (>= 13 ) | 100         | 81.1        | 5.3  | 0   | 52.5     | <.0001* | 0.91 |
| (>= 14 ) | 100         | 81.1        | 5.3  | 0   | 52.5     | <.0001* | 0.91 |
| (>= 15 ) | 100         | 81.3        | 5.3  | 0   | 52.1     | <.0001* | 0.91 |
| (>= 16 ) | 100         | 81.6        | 5.4  | 0   | 51.2     | <.0001* | 0.91 |
| (>= 17 ) | 100         | 82.5        | 5.7  | 0   | 48.6     | <.0001* | 0.91 |
| (>= 18 ) | 100         | 82.5        | 5.7  | 0   | 48.6     | <.0001* | 0.91 |
| (>= 19 ) | 100         | 83.4        | 6.0  | 0   | 46.3     | <.0001* | 0.92 |
| (>= 20 ) | 100         | 84.8        | 6.6  | 0   | 42.3     | <.0001* | 0.92 |
| (>= 21 ) | 100         | 86.2        | 7.2  | 0   | 38.3     | <.0001* | 0.93 |
| (>= 22 ) | 95.0        | 88.2        | 8.1  | 0.1 | 32.3     | <.0001* | 0.92 |
| (>= 23 ) | 95.0        | 89.1        | 8.7  | 0.1 | 29.9     | <.0001* | 0.92 |
| (>= 24 ) | 95.0        | 89.7        | 9.2  | 0.1 | 28.1     | <.0001* | 0.92 |
| (>= 25 ) | 72.7        | 91.8        | 8.9  | 0.3 | 20.0     | <.0001* | 0.82 |
| (>= 26 ) | 63.4        | 93.3        | 9.5  | 0.4 | 14.9     | 0.0001* | 0.78 |
| (>= 27 ) | 63.4        | 93.5        | 9.8  | 0.4 | 14.2     | 0.0002* | 0.78 |
| (>= 28 ) | 63.4        | 94.2        | 10.9 | 0.4 | 12.4     | 0.0004* | 0.79 |
| (>= 29 ) | 63.4        | 96.1        | 16.3 | 0.4 | 7.24     | 0.007*  | 0.80 |
| (>= 30 ) | 63.4        | 97.2        | 22.6 | 0.4 | 4.31     | 0.038*  | 0.80 |
| (>= 31 ) | 41.0        | 98.6        | 29.3 | 0.6 | 0.42     | 0.517   | 0.70 |
| (>= 32 ) | 31.7        | 98.9        | 28.8 | 0.7 | 0.03     | 0.862   | 0.65 |

\*P-value statistically significant 0.05.
