# Supplementary material for: Accuracy of online survey assessment of mental disorders and suicidal thoughts and behaviors in Spanish university students. Results of the WHO World Mental Health- International College Student initiative
Source: PubMed Central journal article supplement (PMC6728025; doi:10.1371/journal.pone.0221529), 2019-09-05
Supplement: pone.0221529.s008.pdf [file pone.0221529.s008.pdf]

**S8 Table. Sensitivity, specificity, likelihood ratio positive (LR+), likelihood ratio negative (LR-), McNemar and Area Under the Curve (AUC) for different cut-off points of Generalized Anxiety Disorder lifetime algorithm for estimating reference standard (MINI) (n=287)**

| Cutpoint | Sensitivity | Specificity | LR+  | LR- | McNemar  |         | AUC  |
|----------|-------------|-------------|------|-----|----------|---------|------|
|          |             |             |      |     | $\chi^2$ | p-value |      |
| (>= 13 ) | 100         | 57.8        | 2.4  | 0   | 115.6    | <.0001* | 0.79 |
| (>= 14 ) | 100         | 58.0        | 2.4  | 0   | 114.9    | <.0001* | 0.79 |
| (>= 15 ) | 100         | 59.5        | 2.5  | 0   | 110.8    | <.0001* | 0.80 |
| (>= 16 ) | 100         | 59.9        | 2.5  | 0   | 109.9    | <.0001* | 0.80 |
| (>= 17 ) | 100         | 60.6        | 2.5  | 0   | 107.9    | <.0001* | 0.80 |
| (>= 18 ) | 100         | 61.2        | 2.6  | 0   | 106.2    | <.0001* | 0.81 |
| (>= 19 ) | 100         | 68.3        | 3.2  | 0   | 86.9     | <.0001* | 0.84 |
| (>= 20 ) | 100         | 69.9        | 3.3  | 0   | 82.4     | <.0001* | 0.85 |
| (>= 21 ) | 100         | 71.4        | 3.5  | 0   | 78.2     | <.0001* | 0.86 |
| (>= 22 ) | 97.3        | 74.8        | 3.9  | 0   | 68.5     | <.0001* | 0.86 |
| (>= 23 ) | 97.3        | 77.4        | 4.3  | 0   | 61.3     | <.0001* | 0.87 |
| (>= 24 ) | 97.3        | 79.4        | 4.7  | 0   | 55.6     | <.0001* | 0.88 |
| (>= 25)  | 85.3        | 83.4        | 5.1  | 0.2 | 42.2     | <.0001* | 0.84 |
| (>= 26 ) | 85.3        | 85.6        | 5.9  | 0.2 | 36.0     | <.0001* | 0.85 |
| (>= 27)  | 85.3        | 86.4        | 6.3  | 0.2 | 34.1     | <.0001* | 0.86 |
| (>= 28 ) | 64.2        | 90.4        | 6.7  | 0.4 | 19.5     | <.0001* | 0.77 |
| (>= 29 ) | 52.6        | 94.1        | 8.9  | 0.5 | 8.35     | 0.004*  | 0.73 |
| (>= 30 ) | 52.6        | 95.7        | 12.2 | 0.5 | 4.47     | 0.035*  | 0.74 |
| (>= 31 ) | 52.6        | 97.2        | 18.8 | 0.5 | 1.67     | 0.196   | 0.75 |
| (>= 32)  | 35.6        | 97.8        | 16.2 | 0.7 | 0.19     | 0.662   | 0.67 |

\*P-value statistically significant 0.05.
