# Supplementary material for: Accuracy of online survey assessment of mental disorders and suicidal thoughts and behaviors in Spanish university students. Results of the WHO World Mental Health- International College Student initiative
Source: PubMed Central journal article supplement (PMC6728025; doi:10.1371/journal.pone.0221529), 2019-09-05
Supplement: pone.0221529.s009.pdf [file pone.0221529.s009.pdf]

**S9 Table. Prevalence estimates of common mental disorders and suicidal thoughts and behaviors in the clinical reappraisal samples recruited at each follow-up, according to the WMH-ICS online survey screeners and the MINI (n= 287) (unweighted values)**

|                                |          | Baseline (n= 45)        |                |      |                | 1 <sup>st</sup> Follow-up (n=91) |                |      |                | 2 <sup>nd</sup> Follow-up (n= 151) |                |      |                |
|--------------------------------|----------|-------------------------|----------------|------|----------------|----------------------------------|----------------|------|----------------|------------------------------------|----------------|------|----------------|
|                                |          | Online survey screeners |                | MINI |                | Online survey screeners          |                | MINI |                | Online survey screeners            |                | MINI |                |
|                                |          | n                       | % (SE)         | n    | % (SE)         | n                                | % (SE)         | n    | % (SE)         | n                                  | % (SE)         | n    | % (SE)         |
| <b>Mental disorders</b>        |          |                         |                |      |                |                                  |                |      |                |                                    |                |      |                |
| <b>Any mood<sup>a</sup></b>    | 12-m     | 10                      | 22,2<br>(0,06) | 3    | 6,7<br>(0,04)  | 17                               | 18,7<br>(0,04) | 11   | 12,9<br>(0,04) | 40                                 | 26,5<br>(0,04) | 18   | 11,9<br>(0,03) |
|                                | Lifetime | 11                      | 24,4<br>(0,06) | 9    | 23,7<br>(0,06) | 40                               | 44<br>(0,05)   | 18   | 21,2<br>(0,04) | 85                                 | 57,0<br>(0,04) | 39   | 26<br>(0,04)   |
| Major depressive episode       | 12-m     | 10                      | 22,2<br>(0,06) | 0    | 0 (0)          | 16                               | 17,6<br>(0,04) | 10   | 11,8<br>(0,03) | 34                                 | 22,5<br>(0,03) | 16   | 10,7<br>(0,03) |
|                                | Lifetime | 11                      | 24,4<br>(0,06) | 5    | 13,2<br>(0,05) | 37                               | 40,7<br>(0,05) | 17   | 19,8<br>(0,04) | 81                                 | 54,4<br>(0,04) | 36   | 24<br>(0,03)   |
| Mania/Hypomania                | 12-m     | 1                       | 2,2<br>(0,02)  | 3    | 6,7<br>(0,04)  | 2                                | 2,2<br>(0,02)  | 1    | 1,1<br>(0,01)  | 11                                 | 7,3<br>(0,02)  | 3    | 2 (0,01)       |
|                                | Lifetime | 1                       | 2,2<br>(0,02)  | 5    | 12,2<br>(0,05) | 5                                | 5,5<br>(0,02)  | 1    | 1,1<br>(0,01)  | 19                                 | 12,8<br>(0,03) | 7    | 4,6<br>(0,02)  |
| <b>Any anxiety<sup>b</sup></b> | 12-m     | 10                      | 22,2<br>(0,06) | 4    | 9,5<br>(0,04)  | 18                               | 19,8<br>(0,04) | 6    | 6,6<br>(0,03)  | 42                                 | 27,8<br>(0,04) | 9    | 6,1<br>(0,02)  |
|                                | Lifetime | 10                      | 22,2<br>(0,06) | 4    | 9,8<br>(0,04)  | 31                               | 34,1<br>(0,05) | 10   | 11<br>(0,03)   | 88                                 | 58,7<br>(0,04) | 18   | 12,2<br>(0,03) |
| Panic disorder                 | 12-m     | 2                       | 4,4<br>(0,03)  | 3    | 6,7<br>(0,04)  | 1                                | 1,1<br>(0,01)  | 5    | 5,5<br>(0,02)  | 2                                  | 1,30<br>(0,01) | 9    | 6 (0,02)       |
|                                | Lifetime | 2                       | 4,4<br>(0,03)  | 3    | 6,7<br>(0,04)  | 2                                | 2,2<br>(0,02)  | 9    | 9,9<br>(0,03)  | 16                                 | 10,9<br>(0,03) | 16   | 10,6<br>(0,03) |
| Generalized anxiety disorder   | 12-m     | 9                       | 20<br>(0,06)   | 2    | 4,8<br>(0,03)  | 17                               | 18,7<br>(0,04) | 3    | 3,3<br>(0,02)  | 41                                 | 27,2<br>(0,04) | 2    | 1,3<br>(0,01)  |
|                                | Lifetime | 9                       | 20<br>(0,06)   | 3    | 7,3<br>(0,04)  | 30                               | 33<br>(0,05)   | 4    | 4,4<br>(0,02)  | 84                                 | 56<br>(0,04)   | 4    | 2,7<br>(0,01)  |

(Continued)

**S9 Table***(Continued)*

| <b>Suicidal thoughts and behaviors</b>       |         |          |    |                |    |                |                |                |    |                |                |                |    |                |
|----------------------------------------------|---------|----------|----|----------------|----|----------------|----------------|----------------|----|----------------|----------------|----------------|----|----------------|
|                                              | Idea    | 12-m     | 5  | 11,1<br>(0,05) |    | 4              | 4,4<br>(0,02)  |                |    | 19             | 12,6<br>(0,03) |                |    |                |
|                                              |         | Lifetime | 9  | 20<br>(0,06)   |    | 25             | 27,5<br>(0,05) |                |    | 64             | 42,4<br>(0,04) |                |    |                |
|                                              | Plan    | 12-m     | 6  | 13,3<br>(0,05) |    | 7              | 7,7<br>(0,03)  |                |    | 14             | 9,3<br>(0,02)  |                |    |                |
|                                              |         | Lifetime | 10 | 22,2<br>(0,06) |    | 15             | 16,5<br>(0,04) |                |    | 51             | 33,8<br>(0,04) |                |    |                |
|                                              | Attempt | 12-m     | 1  | 2,2<br>(0,02)  |    | 0              | 0 (0)          |                |    | 1              | 0,7<br>(0,01)  |                |    |                |
|                                              |         | Lifetime | 2  | 4,4<br>(0,03)  |    | 2              | 2,2<br>(0,02)  |                |    | 6              | 4 (0,02)       |                |    |                |
| Suicidal thoughts and behaviors <sup>c</sup> |         | 12-m     | 6  | 13,3<br>(0,05) | 2  | 4,4<br>(0,03)  | 8              | 8,8<br>(0,03)  | 6  | 6,6<br>(0,03)  | 21             | 13,9<br>(0,03) | 17 | 12,6<br>(0,03) |
|                                              |         | Lifetime | 10 | 22,2<br>(0,06) | 10 | 22,2<br>(0,06) | 26             | 28,6<br>(0,05) | 14 | 15,4<br>(0,04) | 68             | 45<br>(0,04)   | 47 | 34,1<br>(0,04) |

a.- Mood include: Major Depression Episode or Mania/Hypomania, assessed with the Composite International Diagnostic Interview Screening Scales [CIDI-SC]; b.- Anxiety include: Panic Disorder or Generalized Anxiety Disorder, assessed with the Composite International Diagnostic Interview Screening Scales [CIDI-SC]; c.- Suicidal thoughts and behaviors based on definition used in Spain suicide prevalence paper (by MJ. Blasco) including: suicidal ideation, suicide plan and suicide attempt (excluding the questions of death wish and non-suicidal self-injury), assessed with question from the Self-Injurious Thoughts and Behaviors Interview [SITBI] and the Columbia-Suicide Severity Rating Scale [C-SSRS]. SE: Standard Error.
