# Supplementary material for: Accuracy of online survey assessment of mental disorders and suicidal thoughts and behaviors in Spanish university students. Results of the WHO World Mental Health- International College Student initiative
Source: PubMed Central journal article supplement (PMC6728025; doi:10.1371/journal.pone.0221529), 2019-09-05
Supplement: pone.0221529.s010.pdf [file pone.0221529.s010.pdf]

## S1 STARD checklist for reporting of studies of diagnostic accuracy (2015 version)

| Section & Topic          | No         | Item                                                                                                                                                   | Reported on page # |
|--------------------------|------------|--------------------------------------------------------------------------------------------------------------------------------------------------------|--------------------|
| <b>TITLE OR ABSTRACT</b> |            |                                                                                                                                                        |                    |
|                          | <b>1</b>   | Identification as a study of diagnostic accuracy using at least one measure of accuracy (such as sensitivity, specificity, predictive values, or AUC)  | Page 4             |
| <b>ABSTRACT</b>          |            |                                                                                                                                                        |                    |
|                          | <b>2</b>   | Structured summary of study design, methods, results, and conclusions (for specific guidance, see STARD for Abstracts)                                 | Page 4             |
| <b>INTRODUCTION</b>      |            |                                                                                                                                                        |                    |
|                          | <b>3</b>   | Scientific and clinical background, including the intended use and clinical role of the index test                                                     | Page 6-7           |
|                          | <b>4</b>   | Study objectives and hypotheses                                                                                                                        | Page 7             |
| <b>METHODS</b>           |            |                                                                                                                                                        |                    |
| <i>Study design</i>      | <b>5</b>   | Whether data collection was planned before the index test and reference standard were performed (prospective study) or after (retrospective study)     | Page 8             |
| <i>Participants</i>      | <b>6</b>   | Eligibility criteria                                                                                                                                   | Page 8-9           |
|                          | <b>7</b>   | On what basis potentially eligible participants were identified (such as symptoms, results from previous tests, inclusion in registry)                 | Page 8-9           |
|                          | <b>8</b>   | Where and when potentially eligible participants were identified (setting, location and dates)                                                         | Page 8-9           |
|                          | <b>9</b>   | Whether participants formed a consecutive, random or convenience series                                                                                | Page 9             |
| <i>Test methods</i>      | <b>10a</b> | Index test, in sufficient detail to allow replication                                                                                                  | Page 7, 10         |
|                          | <b>10b</b> | Reference standard, in sufficient detail to allow replication                                                                                          | Page 10-11         |
|                          | <b>11</b>  | Rationale for choosing the reference standard (if alternatives exist)                                                                                  | Page 10-11         |
|                          | <b>12a</b> | Definition of and rationale for test positivity cut-offs or result categories of the index test, distinguishing pre-specified from exploratory         | Page 10, 12        |
|                          | <b>12b</b> | Definition of and rationale for test positivity cut-offs or result categories of the reference standard, distinguishing pre-specified from exploratory | Page 11,12         |
|                          | <b>13a</b> | Whether clinical information and reference standard results were available to the performers/readers of the index test                                 | Page 9             |
|                          | <b>13b</b> | Whether clinical information and index test results were available to the assessors of the reference standard                                          | Page 11            |
| <i>Analysis</i>          | <b>14</b>  | Methods for estimating or comparing measures of diagnostic accuracy                                                                                    | Page 11-12         |
|                          | <b>15</b>  | How indeterminate index test or reference standard results were handled                                                                                | Page 12-13         |
|                          | <b>16</b>  | How missing data on the index test and reference standard were handled                                                                                 | Page 12            |
|                          | <b>17</b>  | Any analyses of variability in diagnostic accuracy, distinguishing pre-specified from exploratory                                                      | Page 12-13         |
|                          | <b>18</b>  | Intended sample size and how it was determined                                                                                                         | Page 12            |
| <b>RESULTS</b>           |            |                                                                                                                                                        |                    |
| <i>Participants</i>      | <b>19</b>  | Flow of participants, using a diagram                                                                                                                  | Fig 1, page 13     |
|                          | <b>20</b>  | Baseline demographic and clinical characteristics of participants                                                                                      | Table 1, page 14   |
|                          | <b>21a</b> | Distribution of severity of disease in those with the target condition                                                                                 | -----              |
|                          | <b>21b</b> | Distribution of alternative diagnoses in those without the target condition                                                                            | -----              |
|                          | <b>22</b>  | Time interval and any clinical interventions between index test and reference standard                                                                 | Page 9             |
| <i>Test results</i>      | <b>23</b>  | Cross tabulation of the index test results (or their distribution) by the results of the reference standard                                            | Table 2, page 16   |
|                          | <b>24</b>  | Estimates of diagnostic accuracy and their precision (such as 95% confidence intervals)                                                                | Table 3, page 18   |
|                          | <b>25</b>  | Any adverse events from performing the index test or the reference standard                                                                            | -----              |
| <b>DISCUSSION</b>        |            |                                                                                                                                                        |                    |
|                          | <b>26</b>  | Study limitations, including sources of potential bias, statistical uncertainty, and generalisability                                                  | Page 29-30         |
|                          | <b>27</b>  | Implications for practice, including the intended use and clinical role of the index test                                                              | Page 31            |
| <b>OTHER INFORMATION</b> |            |                                                                                                                                                        |                    |
|                          | <b>28</b>  | Registration number and name of registry                                                                                                               | -----              |
|                          | <b>29</b>  | Where the full study protocol can be accessed                                                                                                          | Page 8             |
|                          | <b>30</b>  | Sources of funding and other support; role of funders                                                                                                  | Page 3             |
